# Supplementary material
Source: HighWire-hosted journal article supplement (https://tsaco.smart01.highwire.org/content/7/1/e000952)
Supplement: inline-supplementary-material-1 [file inline-supplementary-material-1.pdf]

Supplemental Table 1. All unadjusted and adjusted logistic regression associations with early versus delayed treatment

|                                            | Early irrigation & debridement |             |   | Early irrigation without debridement |                         |                 | Early ORIF              |                         |                 | Early antibiotics |             |   |
|--------------------------------------------|--------------------------------|-------------|---|--------------------------------------|-------------------------|-----------------|-------------------------|-------------------------|-----------------|-------------------|-------------|---|
|                                            | OR (95% CI)                    | OR (95% CI) | P | OR (95% CI)                          | OR (95% CI)             | P               | OR (95% CI)             | OR (95% CI)             | P               | OR (95% CI)       | OR (95% CI) | P |
|                                            | Unadjusted                     | Adjusted    |   | Unadjusted                           | Adjusted                |                 | Unadjusted              | Adjusted                |                 | Unadjusted        | Adjusted    |   |
| <i>Demographics</i>                        |                                |             |   |                                      |                         |                 |                         |                         |                 |                   |             |   |
| Age                                        | 1.02 (0.99-1.06)               |             |   | 1.00 (0.98-1.02)                     |                         |                 | 0.98 (0.96-1.00)        |                         |                 | 1.00 (0.99-1.02)  |             |   |
| Sex                                        |                                |             |   |                                      |                         |                 |                         |                         |                 |                   |             |   |
| Female                                     | Ref                            |             |   | Ref                                  |                         |                 | Ref                     |                         |                 | Ref               |             |   |
| Male                                       | 0.20 (0.04-1.06)               |             |   | 0.62 (0.24-1.61)                     |                         |                 | 0.97 (0.41-2.29)        |                         |                 | 0.84 (0.45-1.58)  |             |   |
| <i>Clinical characteristics</i>            |                                |             |   |                                      |                         |                 |                         |                         |                 |                   |             |   |
| Polytrauma (ISS $\geq$ 16)                 | 0.43 (0.14-1.29)               |             |   | 0.78 (0.34-1.79)                     |                         |                 | <b>0.40 (0.19-0.85)</b> |                         |                 | 0.69 (0.39-1.21)  |             |   |
| Moderate/severe TBI in the ED (GCS $<$ 13) | 1.00 (0.33-3.01)               |             |   | <b>0.31 (0.12-0.77)</b>              | <b>0.09 (0.03-0.33)</b> | <b>&lt;0.01</b> | <b>0.26 (0.10-0.65)</b> | <b>0.10 (0.03-0.39)</b> | <b>&lt;0.01</b> | 0.68 (0.36-1.28)  |             |   |
| ICU admission                              | 0.70 (0.25-1.99)               |             |   | 0.50 (0.24-1.04)                     |                         |                 | <b>0.42 (0.21-0.81)</b> |                         |                 | 0.78 (0.47-1.29)  |             |   |
| Injury cause                               |                                |             |   |                                      |                         |                 |                         |                         |                 |                   |             |   |
| Assault, involving gunshot or stab wound   | Ref                            |             |   | Ref                                  |                         |                 | Ref                     |                         |                 | Ref               |             |   |
| Motor vehicle or bicycle collision         | 0.99 (0.29-3.35)               |             |   | 2.26 (0.89-5.75)                     |                         |                 | 0.53 (0.23-1.24)        |                         |                 | 0.92 (0.50-1.69)  |             |   |
| Fall                                       | <b>9.92 (1.08-91.47)</b>       |             |   | 2.13 (0.80-5.68)                     |                         |                 | 1.94 (0.76-4.95)        |                         |                 | 0.79 (0.40-1.57)  |             |   |
| Other                                      | 0.71 (0.11-4.51)               |             |   | 2.87 (0.76-10.86)                    |                         |                 | 1.40 (0.53-3.73)        |                         |                 | 1.71 (0.71-4.11)  |             |   |
| ED discharge destination                   |                                |             |   |                                      |                         |                 |                         |                         |                 |                   |             |   |
| Floor                                      | Ref                            |             |   | Ref                                  |                         |                 | Ref                     |                         |                 | Ref               |             |   |
| Intensive care unit                        | 1.10 (0.24-4.96)               |             |   | 0.54 (0.24-1.23)                     |                         |                 | 0.54 (0.24-1.19)        |                         |                 | 0.86 (0.46-1.58)  |             |   |
| Operating room/interventional radiology    | 0.64 (0.13-3.03)               |             |   | 1.78 (0.50-6.36)                     |                         |                 | 1.01 (0.42-2.44)        |                         |                 | 0.70 (0.34-1.44)  |             |   |
| Stepdown                                   | 0.80 (0.13-4.87)               |             |   | 0.73 (0.15-3.68)                     |                         |                 | 0.64 (0.19-2.14)        |                         |                 | 0.85 (0.31-2.33)  |             |   |

|                                   |                   |                         |                 |                           |                            |                 |                         |                         |                 |                         |                         |             |
|-----------------------------------|-------------------|-------------------------|-----------------|---------------------------|----------------------------|-----------------|-------------------------|-------------------------|-----------------|-------------------------|-------------------------|-------------|
| Other                             | 1.00 (0.05-20.83) |                         |                 | 1.22 (0.03-52.39)         |                            |                 | 0.15 (0.01-6.31)        |                         |                 | 0.21 (0.04-1.08)        |                         |             |
| <i>Facial fracture details</i>    |                   |                         |                 |                           |                            |                 |                         |                         |                 |                         |                         |             |
| Total open facial fractures       |                   |                         |                 |                           |                            |                 |                         |                         |                 |                         |                         |             |
| 1                                 | Ref               |                         |                 | Ref                       |                            |                 | Ref                     |                         |                 | Ref                     |                         |             |
| 2                                 | 0.71 (0.20-2.59)  |                         |                 | 0.79 (0.33-1.89)          |                            |                 | 0.78 (0.36-1.71)        |                         |                 | 0.59 (0.32-1.09)        |                         |             |
| 3+                                | 0.33 (0.09-1.28)  |                         |                 | 1.32 (0.15-11.80)         |                            |                 | 0.26 (0.08)             |                         |                 | 1.59 (0.58-4.34)        |                         |             |
| Fracture location                 |                   |                         |                 |                           |                            |                 |                         |                         |                 |                         |                         |             |
| Mandible                          | 0.52 (0.19-1.48)  |                         |                 | <b>0.30 (0.13-0.69)</b>   |                            |                 | 1.44 (0.68-3.07)        |                         |                 | 0.65 (0.39-1.08)        |                         |             |
| Nasal bone                        | 0.85 (0.27-2.69)  |                         |                 | <b>13.36 (3.09-57.82)</b> | <b>37.70 (7.32-194.17)</b> | <b>&lt;0.01</b> | 0.94 (0.38-2.32)        |                         |                 | 1.17 (0.68-2.01)        |                         |             |
| Maxillary bone                    | 0.47 (0.17-1.36)  | <b>0.05 (0.01-0.49)</b> | <b>&lt;0.01</b> | <b>0.35 (0.12-0.98)</b>   |                            |                 | 0.34 (0.15-0.79)        | <b>0.14 (0.04-0.50)</b> | <b>&lt;0.01</b> | 1.19 (0.62-2.29)        |                         |             |
| Orbital bone                      | 0.60 (0.19-1.94)  |                         |                 | 0.39 (0.10-1.45)          |                            |                 | 0.43 (0.15-1.21)        |                         |                 | 1.32 (0.60-2.91)        |                         |             |
| Zygomax                           | 0.36 (0.09-1.52)  |                         |                 | 0.82 (0.16-4.24)          |                            |                 | <b>0.21 (0.06-0.76)</b> |                         |                 | 2.55 (0.90-7.18)        |                         |             |
| Frontal bone                      | 0.36 (0.04-3.65)  |                         |                 | 0.55 (0.05-6.19)          |                            |                 | 1.28 (0.28-5.92)        |                         |                 | 1.88 (0.36-9.90)        |                         |             |
| Highest type open facial fracture |                   |                         |                 |                           |                            |                 |                         |                         |                 |                         |                         |             |
| Type 1                            | Ref               |                         |                 | Ref                       |                            |                 | Ref                     |                         |                 | Ref                     |                         |             |
| Type 2                            | 0.28 (0.01-13.05) |                         |                 | 2.56 (0.81-7.41)          |                            |                 | 1.87 (0.70-5.01)        |                         |                 | 0.60 (0.29-1.25)        |                         |             |
| Type 3a                           | 0.16 (0.01-7.48)  |                         |                 | 1.13 (0.49-2.63)          |                            |                 | 0.86 (0.35-2.15)        |                         |                 | 1.23 (0.63-2.41)        |                         |             |
| Type 3b                           | 0.09 (0.01-4.20)  |                         |                 | 1.85 (0.40-8.64)          |                            |                 | 0.47 (0.15-1.49)        |                         |                 | 0.94 (0.38-2.33)        |                         |             |
| Type 3c                           | 0.16 (0.01-8.45)  |                         |                 | -                         |                            |                 | 0.75 (0.17-3.36)        |                         |                 | 0.29 (0.07-1.22)        |                         |             |
| Other serious injuries (AIS≥3)    |                   |                         |                 |                           |                            |                 |                         |                         |                 |                         |                         |             |
| Head                              | 0.40 (0.13-1.25)  | <b>0.04 (0.01-0.39)</b> | <b>&lt;0.01</b> | 0.85 (0.37-1.94)          |                            |                 | <b>0.33 (0.15-0.73)</b> | <b>0.14 (0.04-0.48)</b> | <b>&lt;0.01</b> | 0.98 (0.55-1.72)        |                         |             |
| Neck                              | 0.13 (0.02-1.15)  |                         |                 | 0.46 (0.13-1.65)          |                            |                 | <b>0.03 (0.01-0.61)</b> |                         |                 | <b>0.36 (0.15-0.88)</b> | <b>0.39 (0.16-0.96)</b> | <b>0.04</b> |
| Thorax                            | 0.56 (0.05-6.48)  |                         |                 | 0.72 (0.18-2.86)          |                            |                 | 0.61 (0.17-2.26)        |                         |                 | 0.42 (0.15-1.20)        |                         |             |

|                                     |                            |                              |                 |                         |                           |                 |                           |                              |                 |                   |  |  |
|-------------------------------------|----------------------------|------------------------------|-----------------|-------------------------|---------------------------|-----------------|---------------------------|------------------------------|-----------------|-------------------|--|--|
| Abdomen                             | 6.14 (0.14-262.26)         |                              |                 | 1.11 (0.12-10.22)       |                           |                 | 0.95 (0.13-6.90)          | <b>35.90 (2.24-575.25)</b>   | <b>0.01</b>     | 1.88 (0.36-9.90)  |  |  |
| Spine                               | 0.37 (0.01-35.04)          |                              |                 | 3.19 (0.13-77.70)       |                           |                 | 0.18 (0.01-7.70)          |                              |                 | 0.74 (0.15-3.72)  |  |  |
| Upper extremity                     | 0.37 (0.01-35.04)          |                              |                 | -                       |                           |                 | 0.31 (0.01-29.18)         |                              |                 | 0.25 (0.01-22.81) |  |  |
| Lower extremity                     | 0.37 (0.01-35.04)          |                              |                 | -                       |                           |                 | 0.31 (0.01-29.18)         |                              |                 | 0.25 (0.01-22.81) |  |  |
| Total regions with serious injuries |                            |                              |                 |                         |                           |                 |                           |                              |                 |                   |  |  |
| 0                                   | Ref                        |                              |                 | Ref                     |                           |                 | Ref                       |                              |                 | Ref               |  |  |
| 1                                   | <b>0.26 (0.07-0.95)</b>    |                              |                 | 1.04 (0.45-2.43)        |                           |                 | <b>0.39 (0.18-1.86)</b>   |                              |                 | 1.21 (0.67-2.19)  |  |  |
| 2                                   | 0.72 (0.13-4.07)           |                              |                 | 0.43 (0.10-1.89)        |                           |                 | 0.21 (0.04-1.01)          |                              |                 | 0.40 (0.14-1.14)  |  |  |
| 3                                   | 0.23 (0.01-23.46)          |                              |                 | 0.45 (0.04-4.88)        |                           |                 | 0.09 (0.01-2.85)          |                              |                 | 0.71 (0.10-5.20)  |  |  |
| 4                                   | 0.23 (0.02-23.46)          |                              |                 | 0.74 (0.01-63.52)       |                           |                 | 0.19 (0.01-20.33)         |                              |                 | 0.14 (0.01-5.96)  |  |  |
| <i>OR and tracheostomy</i>          |                            |                              |                 |                         |                           |                 |                           |                              |                 |                   |  |  |
| OR ≤24h of arrival                  | <b>21.00 (2.53-173.93)</b> | <b>377.26 (18.07-999.99)</b> | <b>&lt;0.01</b> | <b>4.00 (1.79-8.93)</b> | <b>13.54 (4.62-39.73)</b> | <b>&lt;0.01</b> | <b>22.31 (8.02-62.08)</b> | <b>154.92 (35.80-670.38)</b> | <b>&lt;0.01</b> | 1.06 (0.64-1.76)  |  |  |
| Tracheostomy ≤24h of arrival        | 0.65 (0.14-3.00)           |                              |                 | 0.82 (0.08-8.17)        |                           |                 | 0.94 (0.26-3.41)          |                              |                 | 0.51 (0.16-1.66)  |  |  |
